# Supplementary material for: Circulating tumor cell copy-number heterogeneity in ALK-rearranged non-small-cell lung cancer resistant to ALK inhibitors
Source: PubMed Central journal article supplement (PMC8285416; doi:10.1038/s41698-021-00203-1), 2021-07-16
Supplement: 41698_2021_203_MOESM1_ESM.pdf [file 41698_2021_203_MOESM1_ESM.pdf]

**a.**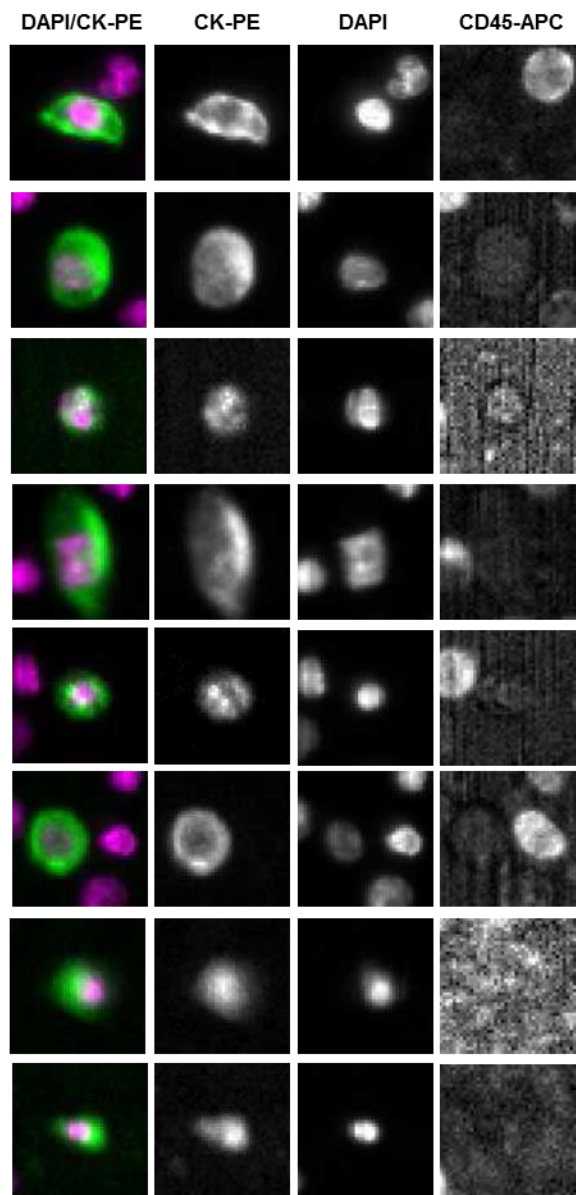**b.**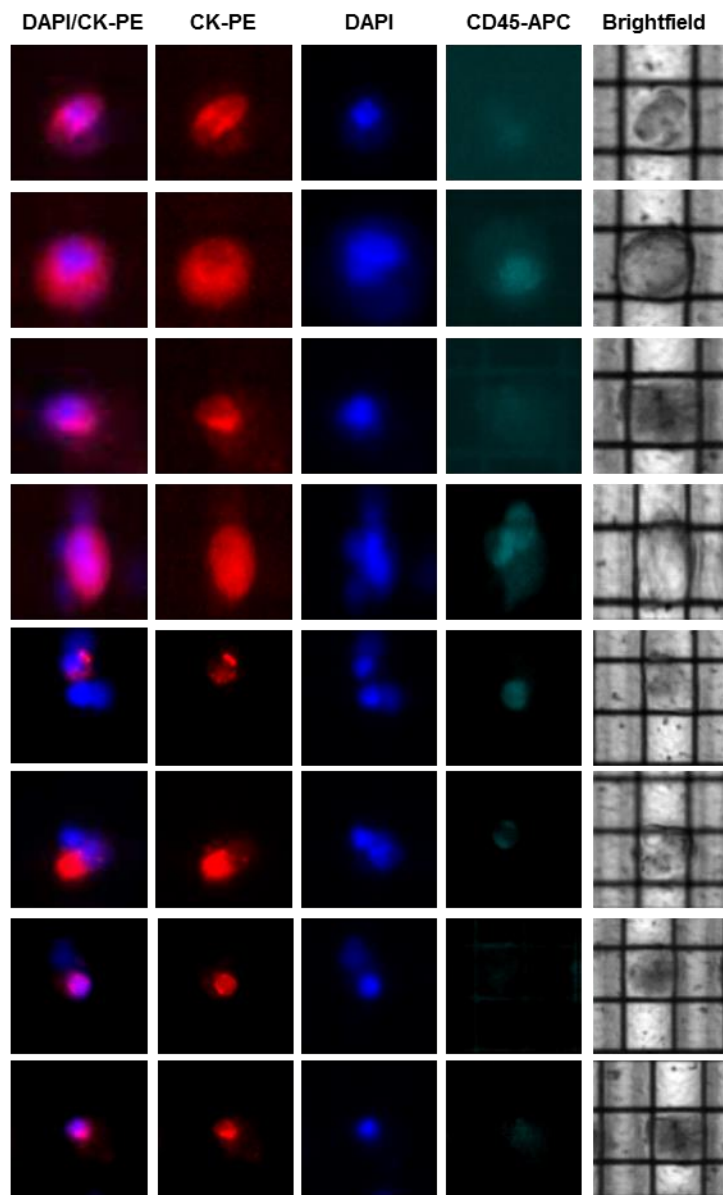

**Supplementary Figure 1.** Isolated CTCs by DEPArray. **(a)** Enrichment and detection of CTCs by the CellSearch. **(b)** Isolation of single CTCs using the DEPArray. The  $VHL^{R161}$  mutation was previously identified in one P49 CK<sup>+</sup> CTC (27).

**a.****P43 - CTC 1 (ALK+/CK-)**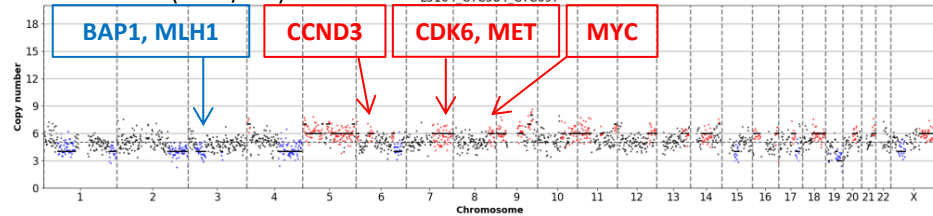**P43 - CTC 2 (ALK+/CK-)**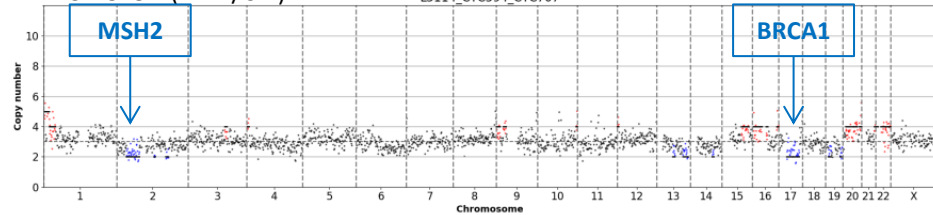**P43 - CTC 3 (ALK+/CK-)**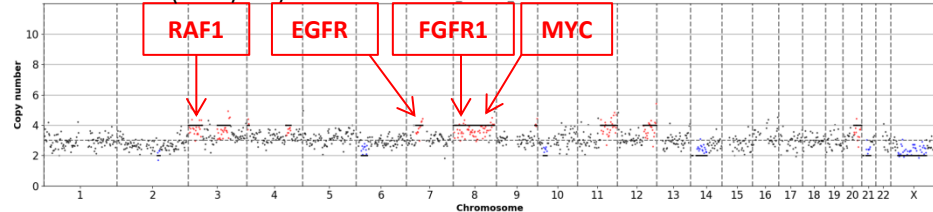**P43 - Germline control DNA**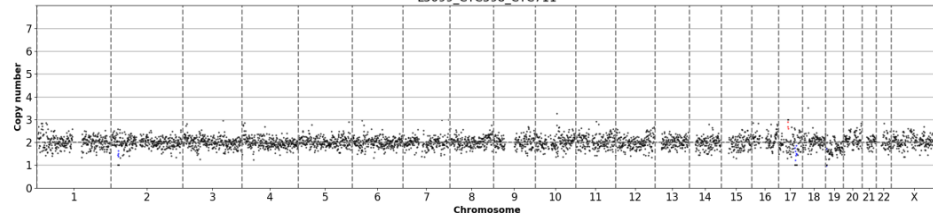**P43 - Hoechst+/CD45+ cells**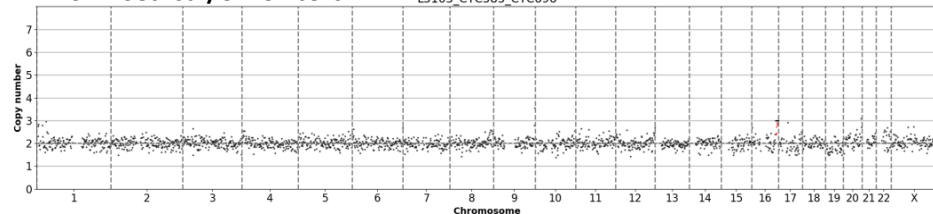**b.****P49 - CTC 1 (CK+)**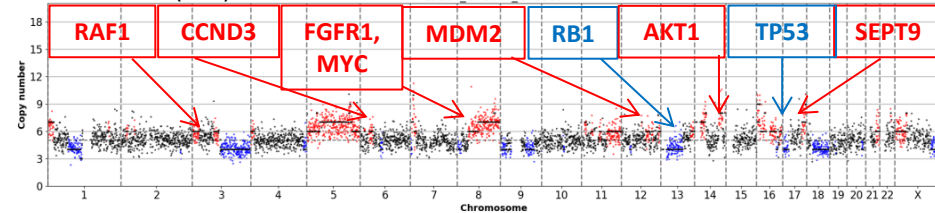**P49 - CTC 2 (CK+)**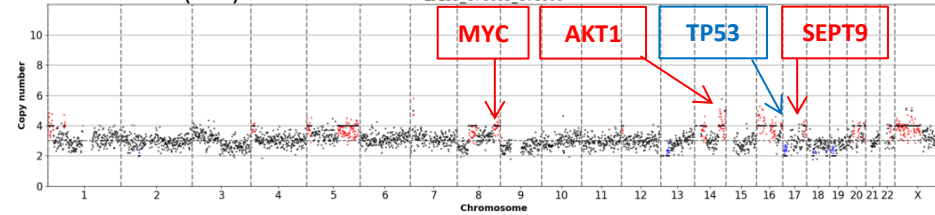**P49 - CTC 3 (CK+)**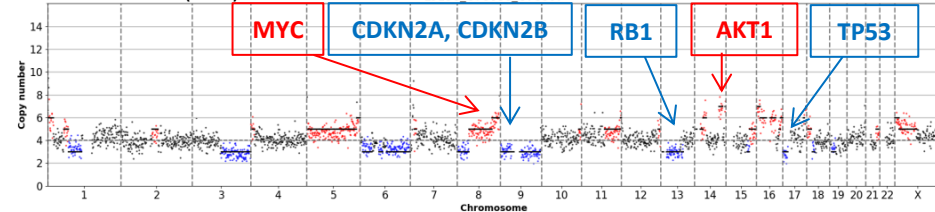**P49 - CTC 4 (CK+)**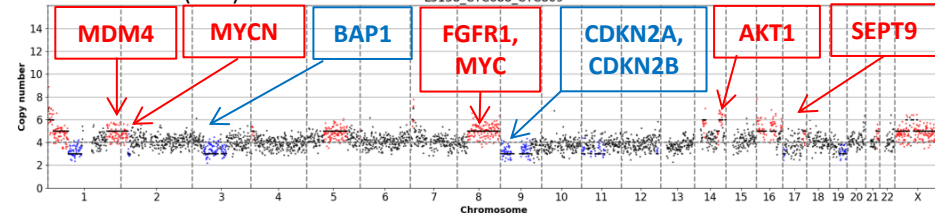**P49 - CTC 5 (CK+)**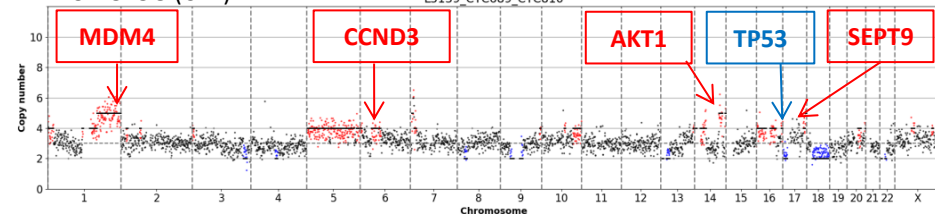

**b.****P49 - CTC 6 (ALK-/CK+)**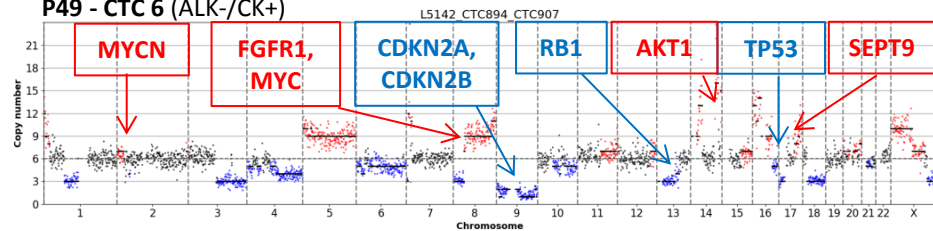**P49 - CTC 7 (ALK-/CK+)**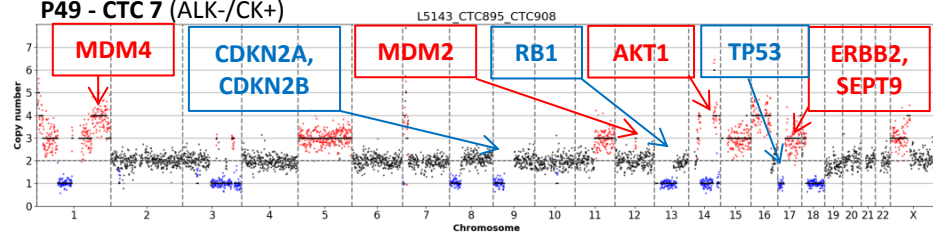**P49 - CTC 8 (ALK-/CK+)**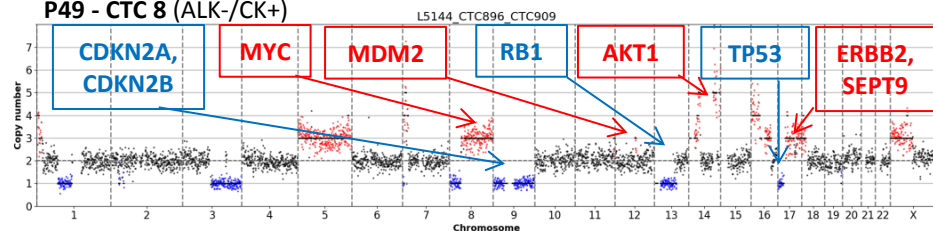**P49 - CTC 9 (ALK-/CK+)**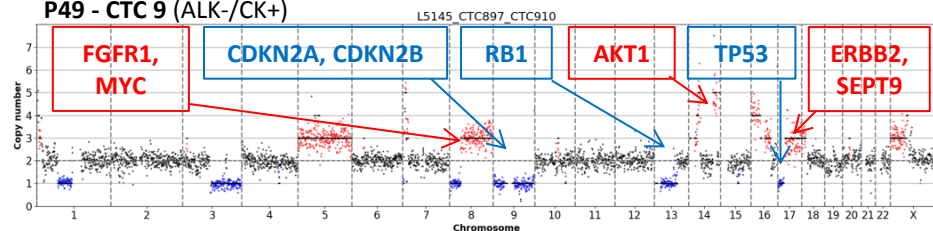**P49 - CTC 10 (ALK-/CK+)**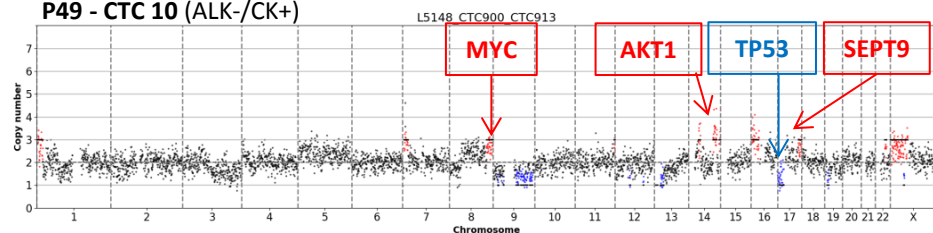**P49 - CTC 11 (ALK-/CK+)**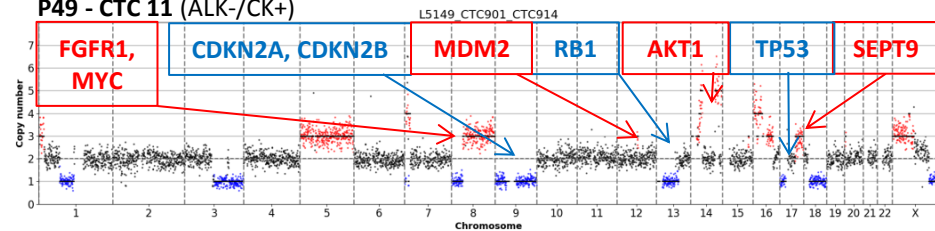**P49 - CTC 12 (ALK-/CK+)**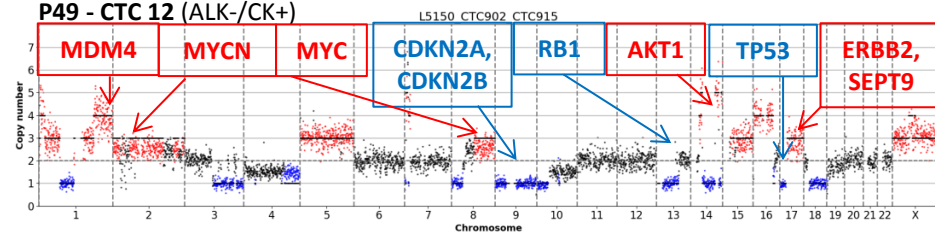**P49 - CTC 13 (ALK-/CK+)**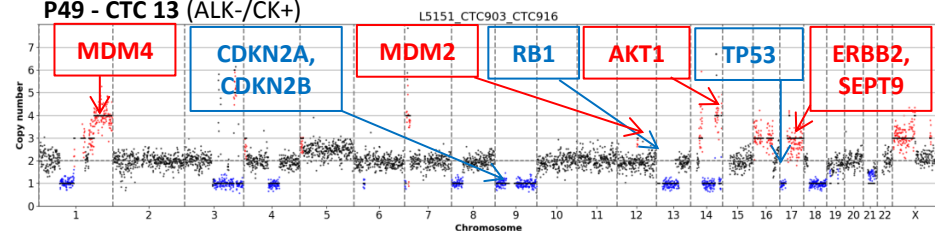**P49 - CTC 14 (ALK-/CK+)**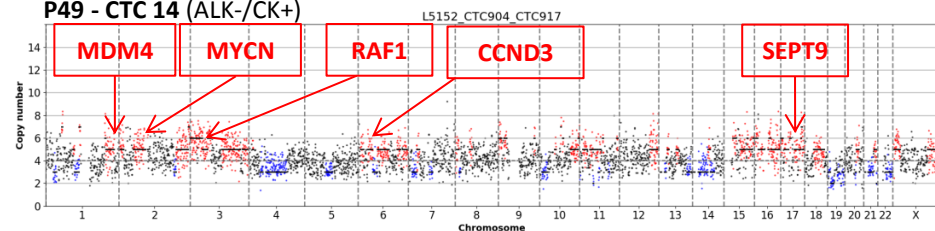**P49 - Germline control DNA**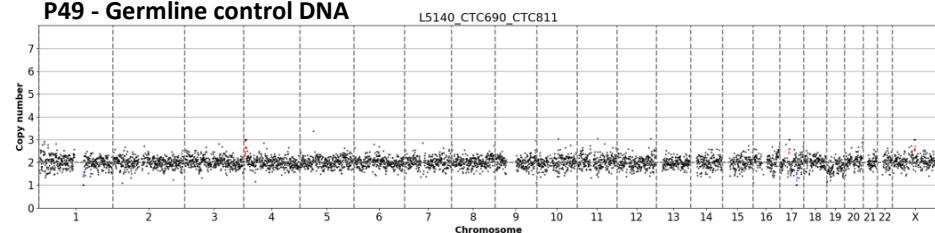

**b.****P49 - Hoechst+/CD45+ cells**

L5141\_CTC893\_CTC906

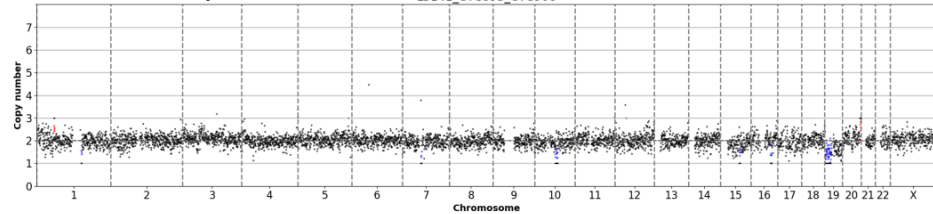**c.****P50 - CTC 1 (ALK-/CK+)**

L5050\_CTC791\_CTC795

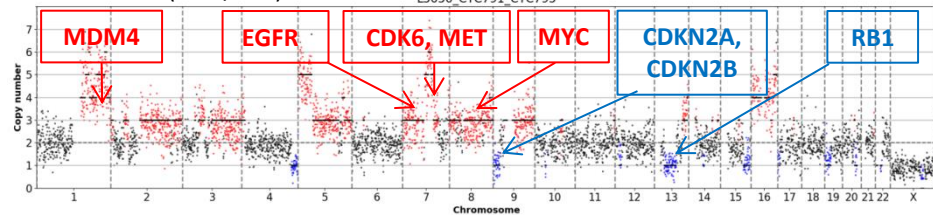**P50 - CTC 2 (CK+)**

L5051\_CTC792\_CTC796

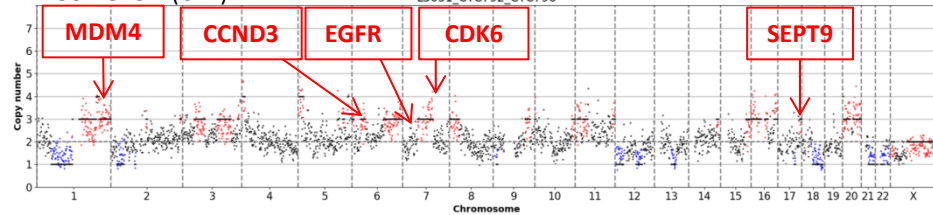**P50 - Germline control DNA**

L5053\_CTC871\_CTC872

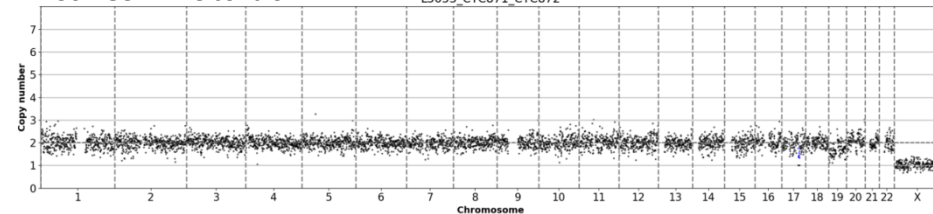**P50 - Hoechst+/CD45+ cells**

L5049\_CTC790\_CTC794

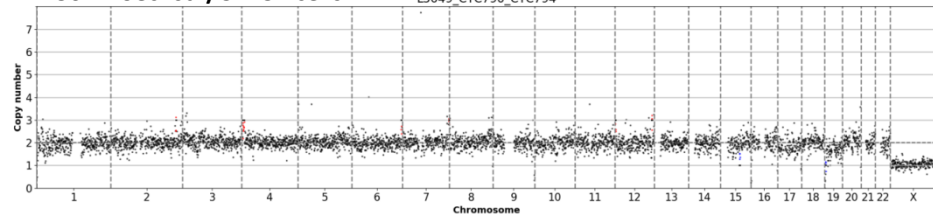**d.****P45 - CTC 1 (ALK-/CK+)**

L5082\_CTC737\_CTC747

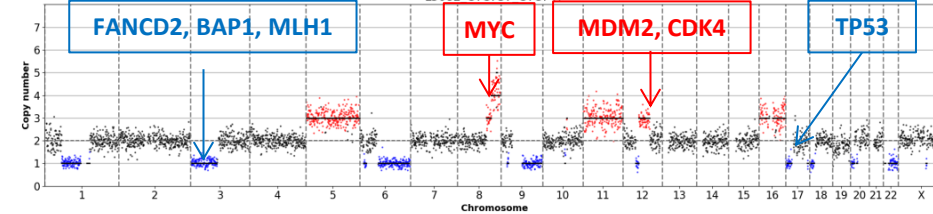**P45 - CTC 2 (ALK-/CK+)**

L5084\_CTC739\_CTC749

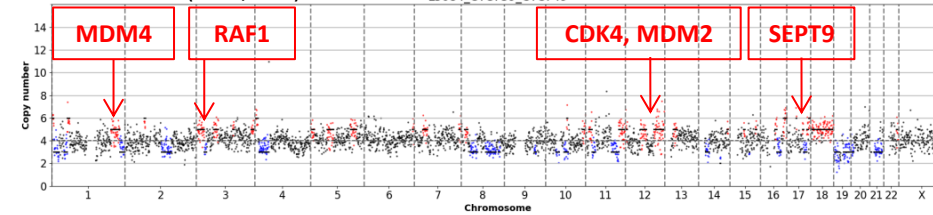**P45 - CTC 3 (ALK-/CK+)**

L5086\_CTC741\_CTC751

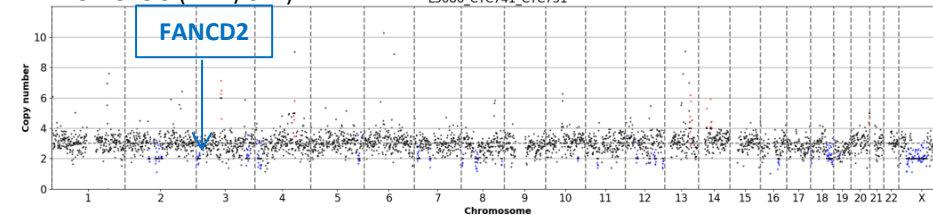**P45 - CTC 4 (ALK-/CK+)**

L5089\_CTC744\_CTC754

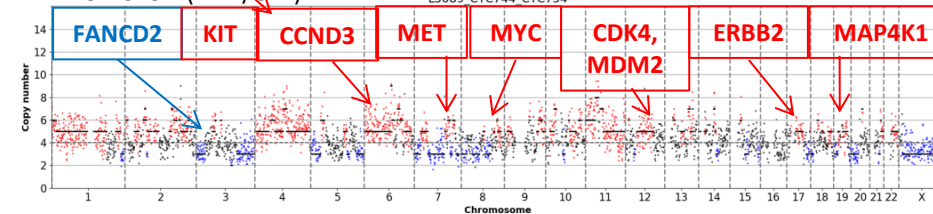**P45 - CTC 5 (Unknown phenotype)**

L5091\_CTC828\_CTC833

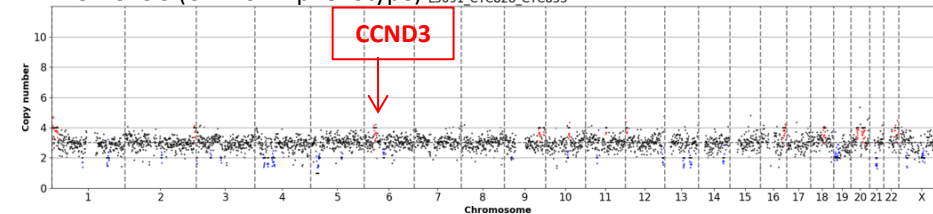

**d.****P45 - CTC 6 (Unknown phenotype)**

L5092\_CTC829\_CTC834

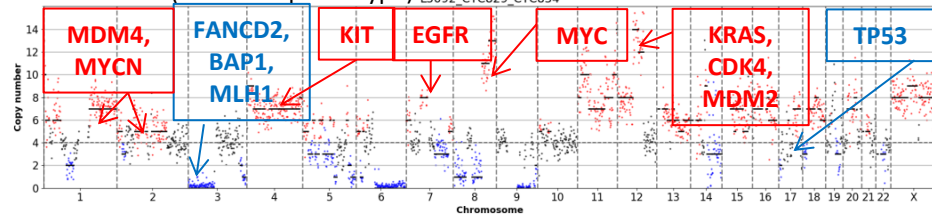**P45 - CTC 7 (ALK+/CK+)**

L5093\_CTC830\_CTC835

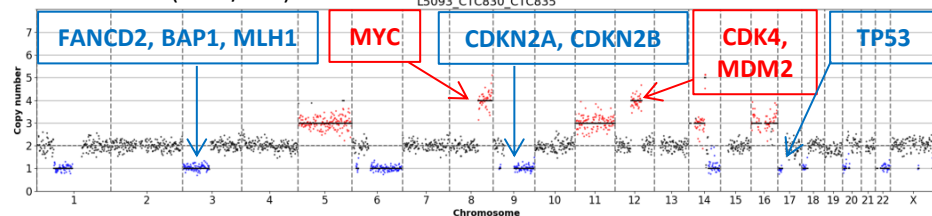**P45 - Germline control DNA**

L5090\_CTC745\_CTC755

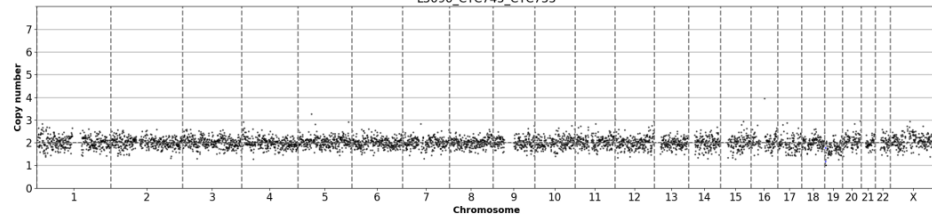**P45 - Hoechst+/CD45+ cells**

L5081\_CTC736\_CTC746

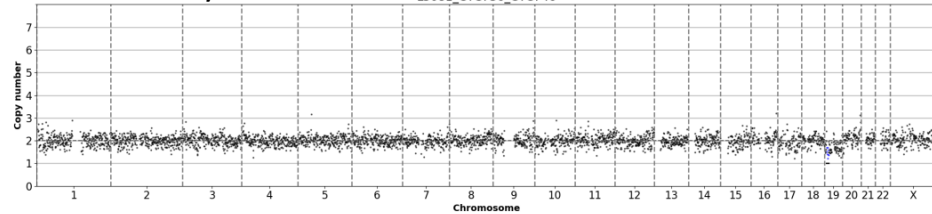**P45 - Biopsy**

L5095\_CTC832\_CTC837

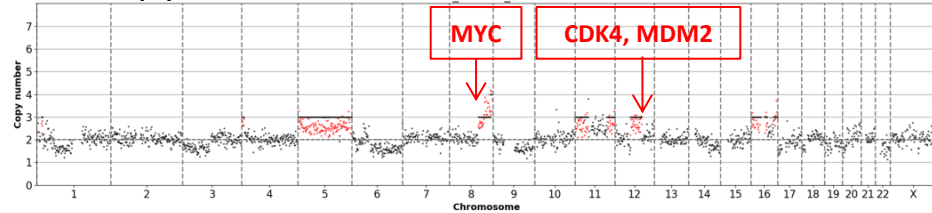**e.****P49 - CTC 15 (CK+)**

L5137\_CTC687\_CTC808

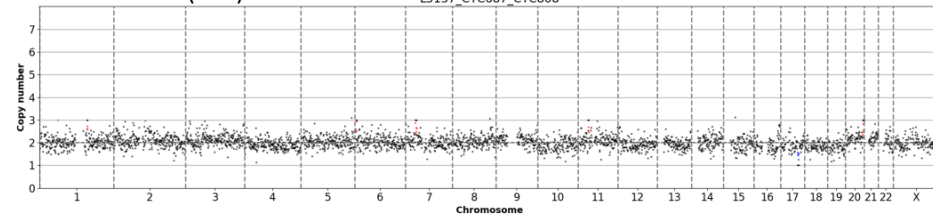**P45 - CTC 8 (ALK-/CK+)**

L5085\_CTC740\_CTC750

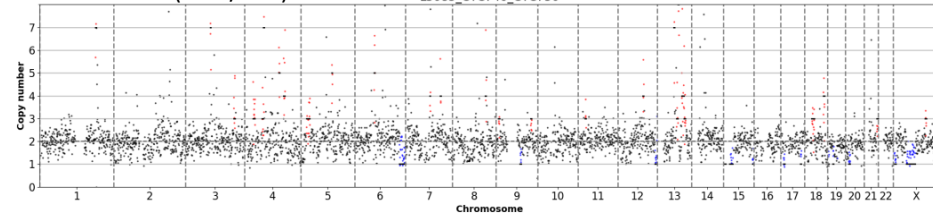**P45: CTC 9 (ALK-/CK+)**

L5087\_CTC742\_CTC752

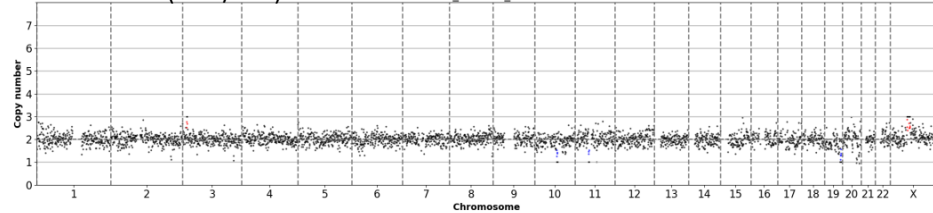**P45 - CTC 10 (ALK-/CK+)**

L5088\_CTC743\_CTC753

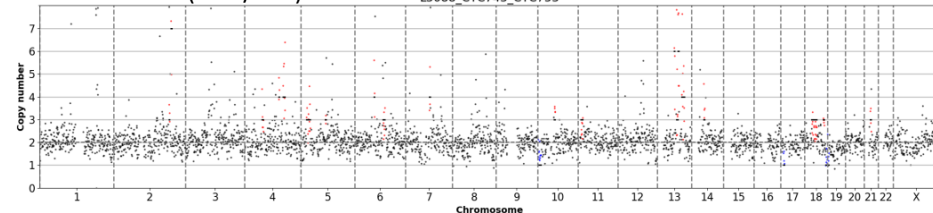**P45 - CTC 11 (ALK+/CK+)**

L5094\_CTC831\_CTC836

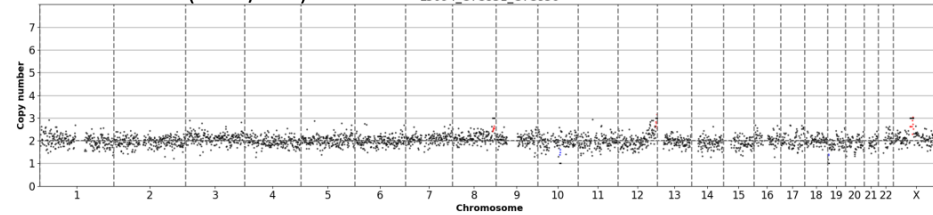

**Supplementary Figure 2.** Low-pass whole-genome CNA profiles of CTC samples from *ALK*-positive patients at resistance to ALK-TKIs. CNAs in predominant pathways are annotated (gain in red, loss in blue). **(a)** CNA profiles of CTCs, corresponding leucocytes and germline DNA from patient P43 resistant to crizotinib. **(b)** CNA profiles of CTCs, corresponding leucocytes and germline DNA from patient P49 resistant to crizotinib. **(c)** CNA profiles of CTCs, corresponding leucocytes and germline DNA from patient P50 resistant to crizotinib. **(d)** CNA profiles of CTCs, corresponding tumor biopsy, leucocytes and germline DNA from patient P45 resistant to lorlatinib. **(e)** Flat CNA profiles of CK<sup>+</sup> cells from P49 and P45.

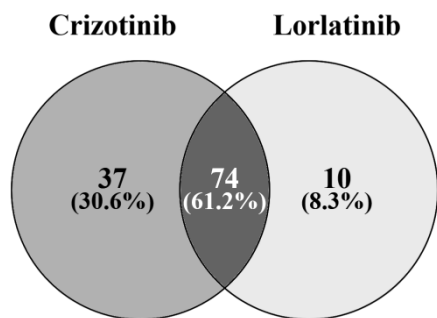

**Supplementary Figure 3.** Numbers and percentages of CNA drivers identified in crizotinib-resistant patients only, in lorlatinib-resistant patients only and in both.

**Supplementary Table 1.** Detailed list of CNAs identified in tumor samples (38 CTC samples and one tumor biopsy) of *ALK*-positive patients at resistance to ALK-TKIs.



| ALK TKI    | Patient | Sample ID | WGA QC<br>GII ( /4) | LowPass Genome QC |      |      |     |
|------------|---------|-----------|---------------------|-------------------|------|------|-----|
|            |         |           |                     | Read counts       | DLRS | LMAD | R50 |
| Crizotinib | P43     | CTC 1     | 3                   | 718,457           | 0,25 | 0,23 | 45  |
| Crizotinib | P43     | CTC 2     | 3                   | 638,892           | 0,24 | 0,23 | 45  |
| Crizotinib | P43     | CTC 3     | 3                   | 399,283           | 0,24 | 0,23 | 45  |
| Crizotinib | P46     | CTC 1     | 4                   | 771,976           | 0,25 | 0,25 | 46  |
| Crizotinib | P46     | CTC 2     | 4                   | 851,956           | 0,28 | 0,28 | 46  |
| Crizotinib | P46     | CTC 3     | 4                   | 855,924           | 0,24 | 0,24 | 46  |
| Crizotinib | P46     | CTC 4     | 4                   | 876,131           | 0,22 | 0,21 | 46  |
| Crizotinib | P46     | CTC 5     | 4                   | 838,436           | 0,25 | 0,24 | 46  |
| Crizotinib | P46     | CTC 6     | 3                   | 1,030,049         | 0,28 | 0,30 | 46  |
| Crizotinib | P46     | CTC 7     | 3                   | 1,122,952         | 0,31 | 0,32 | 46  |
| Crizotinib | P46     | CTC 8     | 4                   | 737,347           | 0,24 | 0,26 | 46  |
| Crizotinib | P46     | CTC 9     | 4                   | 835,369           | 0,26 | 0,26 | 45  |
| Crizotinib | P46     | CTC 10    | 4                   | 957,580           | 0,27 | 0,26 | 45  |
| Crizotinib | P46     | CTC 11    | 4                   | 1,026,747         | 0,32 | 0,33 | 46  |
| Crizotinib | P49     | CTC 1     | 4                   | 1,696,671         | 0,23 | 0,64 | 46  |
| Crizotinib | P49     | CTC 2     | 4                   | 1,029,086         | 0,22 | 0,22 | 45  |
| Crizotinib | P49     | CTC 3     | 3                   | 868,550           | 0,23 | 0,67 | 45  |
| Crizotinib | P49     | CTC 4     | 4                   | 1,125,220         | 0,22 | 0,42 | 46  |
| Crizotinib | P49     | CTC 5     | 4                   | 1,050,782         | 0,22 | 0,22 | 45  |
| Crizotinib | P49     | CTC 6     | 3                   | 989,475           | 0,27 | 0,64 | 44  |
| Crizotinib | P49     | CTC 7     | 3                   | 1,452,899         | 0,25 | 0,22 | 45  |
| Crizotinib | P49     | CTC 8     | 3                   | 1,445,407         | 0,23 | 0,21 | 44  |
| Crizotinib | P49     | CTC 9     | 4                   | 1,319,753         | 0,24 | 0,20 | 46  |
| Crizotinib | P49     | CTC 10    | 4                   | 1,411,964         | 0,23 | 0,59 | 46  |
| Crizotinib | P49     | CTC 11    | 3                   | 1,579,673         | 0,24 | 0,20 | 44  |
| Crizotinib | P49     | CTC 12    | 4                   | 1,661,213         | 0,26 | 0,42 | 47  |
| Crizotinib | P49     | CTC 13    | 4                   | 1,600,028         | 0,25 | 0,41 | 46  |
| Crizotinib | P49     | CTC 14    | 3                   | 1,390,551         | 0,29 | 0,91 | 46  |
| Crizotinib | P49     | CTC 15    | 3                   | 1,092,214         | 0,22 | 0,21 | 46  |
| Crizotinib | P50     | CTC 1     | 3                   | 1,675,152         | 0,31 | 0,32 | 45  |
| Crizotinib | P50     | CTC 2     | 2*                  | 934,641           | 0,27 | 0,55 | 44  |
| Lorlatinib | P41     | CTC 1     | 1*                  | 1,279,226         | 0,33 | 0,38 | 46  |
| Lorlatinib | P45     | CTC 1     | 4                   | 1,363,737         | 0,23 | 0,20 | 46  |
| Lorlatinib | P45     | CTC 2     | 4                   | 1,207,893         | 0,24 | 0,24 | 46  |
| Lorlatinib | P45     | CTC 3     | 4                   | 1,108,999         | 0,27 | 0,25 | 47  |
| Lorlatinib | P45     | CTC 4     | 4                   | 1,137,825         | 0,29 | 0,78 | 46  |
| Lorlatinib | P45     | CTC 5     | 3                   | 1,097,406         | 0,23 | 0,21 | 47  |
| Lorlatinib | P45     | CTC 6     | 3                   | 805,981           | 0,51 | 0,71 | 45  |
| Lorlatinib | P45     | CTC 7     | 2*                  | 782,591           | 0,23 | 0,19 | 47  |
| Lorlatinib | P45     | CTC 8     | 4                   | 1,239,079         | 0,31 | 0,44 | 48  |
| Lorlatinib | P45     | CTC 9     | 4                   | 1,139,258         | 0,21 | 0,19 | 46  |
| Lorlatinib | P45     | CTC 10    | 4                   | 1,027,209         | 0,31 | 0,41 | 47  |
| Lorlatinib | P45     | CTC 11    | 4                   | 948,745           | 0,22 | 0,19 | 47  |
| Lorlatinib | P45     | Biopsy    | 4                   | 656,066           | 0,21 | 0,41 | 46  |

Abbreviations: DLRS, derivative log ratio spread is a measure of point-to-point consistency or noisiness in copy number along the genome (expected = 0,2-0,3); LMAD, absolute deviation from local median copy number (expected = 0,2-0,3); R50, percentage of target (total bp of genome covered) covered by 50% of reads. Low values (<20%) indicate low WGA/library complexity.

DLRS and LMAD are calculated with a subsampled number of 200,000 reads.

\* The three CTC samples with lower Genome Integrity Index (GII) passed sequencing QC and 43 CTC samples in total were analyzed by the LowPass WGS.

## **Supplementary Table 2.** Whole Genome Amplification and LowPass Genome quality controls
